# Supplementary material for: Cohesin-based chromatin interactions enable regulated gene expression within preexisting architectural compartments
Source: HighWire-hosted journal article supplement (doi:10.1101/gr.161620.113), 2013-09-03
Supplement: Supplemental_Legends.docx [file Supplemental_Legends.docx]

**Supplemental Figure S1**. Impact of Rad21 deletion on RAD21- and CTCF-association with chromatin.

(*A*) Western blotting was used to determine differences in RAD21 protein expression between control and *Rad21*-deleted thymocytes. Residual RAD21 in whole cell lysates was 20.8% of control after normalising to histone H3 and 7.3% of control after normalising to tubulin, residual RAD21 in the chromatin fraction was 10.8% of control after normalising to histone H3.

(*B*) ChIP and quantitative PCR were used to determine differences in RAD21 and CTCF protein binding to specific chromosomal sites in control and *Rad21*-deleted thymocytes. Sites X:100692 and 17:13025 are negative controls and 17:17783 and 11:53442 are known cohesin and CTCF binding sites (Parelho et al., 2008). Residual RAD21 binding was 12% of control after normalising to input (mean ± SE, n=2). CTCF binding was not significantly different between control and cohesin-depleted cells (mean ± SE, n=2).

(*C*) Immunoblot validation of antibodies used for MED1 and NIPBL ChIP-seq. Methods are as in (*A*).

(*D*) ChIP-qPCR validation of antibodies used for MED1 and NIPBL ChIP-seq. Localisation of CTCF, RAD21, NIPBL and MED1 binding to known CTCF-cohesin binding sites (17:17783 and 11:53442), promoters characterized by Kagey et al., 2010 (*Ubc* and *Tinf2*) and the *Tcra* promoter TEA. Data (Seitan et al., 2011) were generated with the same batches of antibodies used for the ChIP-seq experiments presented here.

(*E*) Analysis of the NIPBL ChIP-seq data showing overlap with RAD21 and CTCF peaks. ChIP-seq data were analysed by SWEMBL. As one peak can overlap more than one peak from a different factor, regions for RAD21, CTCF and NIPBL were merged to obtain a set of mutually exclusive genomic regions.

**Supplemental Figure S2**. Univariate multinomial logistic regression analysis of predictors of differential gene expression in cohesin-deficient thymocytes. We used a regression model that integrated gene expression, Hi-C and ChIP-seq data to predict up-regulated, down-regulated and unchanged genes. We tested each gene for the presence or absence of ChIP-seq peaks near the promoter (TSS±2.5 kb) and location within 100kb differentially interacting regions (divided into interactions that were stronger, DI region (Up), or weaker, DI region (Down), in cohesin-deficient thymocytes). We also considered the presence of the H3K4me3 histone modification, the binding of RAD21, CTCF, NIPBL and Mediator (MED1), RNA Pol II (RNAP2), paused RNA Pol II at the promoter (Hendrix et al., 2008), the presence of a promoter CpG island (CGI) and gene length. Error bars represent 95% confidence intervals. In contrast to the multivariate analysis shown in Fig. 4C, variables were evaluated separately. Variables are ranked by coefficient significance from left to right.

**Supplemental Figure S3**. Features of cohesin-dependent genes.

(*A*) Down-regulated genes are enriched for weakened chromatin interactions in cohesin-deficient cells.

(*B*) Promoter CpG content of deregulated genes (DE) and genes participating in differential interactions (DI) in cohesin-deficient thymocytes. Up-regulated genes are associated with higher levels of promoter CpG dinucleotides (TSS±2.5kb) than both down-regulated and non-differentially expressed genes. Likewise, genes participating in increased interactions in cohesin-deficient thymocytes tend to have higher promoter CpG content. Outliers are not depicted.

(*C*) Gene length of deregulated genes (DE) and genes participating in differential interactions (DI) in cohesin-deficient thymocytes. Down-regulated genes are significantly longer than both up-regulated and non-differentially expressed genes. Likewise, genes involved in decreased interactions in cohesin-deficient thymocytes tend to be longer. Outliers are not depicted.

(*E*) Genes with complex regulatory inputs require cohesin for full expression. UCNE, ultraconserved non-coding elements (Dimitrieva et al., 2013).

**Supplemental Figure S4**. Selectivity of increased interactions in cohesin-deficient thymocytes.

(*A*) Impact of cohesin-deficiency on all pair-wise feature-based interactions as assayed by SIMA (see methods and Fig. 5B). 'Random' sites (green text) were defined as at least 10kb removed from other features. Note that interactions involving these random sites showed little cohesin dependence.

(*B*) Instead of all H3K27me3-marked regions as in (*A*), only univalent ('Uni') H3K27me3-marked regions are shown thereby excluding bivalent regions marked by both H3K27me3 and H3K4me3.

**Supplemental Figure S5**. Compartment size and the impact of cohesin-deficiency on pair-wise feature-based interactions.

Interactions were assayed by SIMA and stratified by compartment size (see methods and Fig. 5B). The effect of reduced cohesin-based interactions is most pronounced within the more numerous smaller compartments (300kb-3Mb), whereas increased alternative interactions dominate within larger compartments (3-5MB)

**Supplemental data files.**

Supplemental Table 1. Differential interactions as determined by HOMER analysis of Hi-C data and differential gene expression in cohesin-deficient thymocytes.

Supplemental Table 2. Complete GO Biological Process term analysis of genes differentially expressed between control and cohesin-deficient thymocytes.

Supplemental Table 3. Summary of Hi-C data used.

Supplemental Table 4. Summary of ChIP-seq data used.

Supplemental Table 5. Scores for pairs of interactions analyzed by SIMA.
